# Supplementary material
Source: HighWire-hosted journal article supplement (https://www.jrheum.org/highwire/filestream/38298/field_highwire_adjunct_files/0/190602DataSuppl-2.pdf)
Supplement: 190602DataSuppl-2.pdf [file 190602DataSuppl-2.pdf]

ONLINE SUPPLEMENTARY MATERIAL

| Parameters              | Psoriatic Arthritis (Naïve) | Healthy Controls |
|-------------------------|-----------------------------|------------------|
| Number, n               | 31                          | 20               |
| Sex, female, %          | 22 (69%)                    | 13 (65%)         |
| Age, Years              | 46.1 (12.503)               | 38.0 (11.2)      |
| DAS28-CRP               | 3.534(1.136)                | N/A              |
| CRP, mg/l               | 8.357 (10.704)              | N/A              |
| ESR, mm/h               | 20.034 (15.667)             | N/A              |
| SJC                     | 2.067 (2.363)               | N/A              |
| TJC                     | 2.9 (3.604)                 | N/A              |
| Disease Duration, years | 3 (1.17)                    | N/A              |

DAS28, Disease activity score; CRP, C-reactive protein; ESR, erythrocyte sedimentation rate; SJC, swollen joint count; TJC, tender joint count.

**Supplementary Table 1** Clinical characteristics of psoriatic arthritis patients and healthy controls recruited to the study.

---

|             |             |
|-------------|-------------|
| let-7b-5p   | miR-20a-5p  |
| let-7d-5p   | miR-20b-5p  |
| let-7e-5p   | miR-21-5p   |
| let-7g-5p   | miR-210-3p  |
| let-7i-5p   | miR-22-3p   |
| miR-10a-5p  | miR-221-3p  |
| miR-122-5p  | miR-223-3p  |
| miR-1246    | miR-23a-3p  |
| miR-125a-5p | miR-24-3p   |
| miR-126-3p  | miR-26a-5p  |
| miR-129-5p  | miR-29a-3p  |
| miR-130a-3p | miR-25b-3p  |
| miR-132-3p  | miR-29c-3p  |
| miR-140-3p  | miR-30a-5p  |
| miR-142-3p  | miR-30b-5p  |
| miR-145-5p  | miR-320a    |
| miR-146a-5p | miR-320d    |
| miR-150-5p  | miR-339-5p  |
| miR-151a-5p | miR-33a-5p  |
| miR-154-3p  | miR-342-3p  |
| miR-155-5p  | miR-34a-5p  |
| miR-15a-5p  | miR-375     |
| miR-15b-5p  | miR-376b-3p |
| miR-16-5p   | miR-422a    |
| miR-16-2-3p | miR-429     |
| miR-17-5p   | miR-431-3p  |
| miR-181a-5p | miR-451-3p  |
| miR-181b-5p | miR-486-5p  |
| miR-185-5p  | miR-494-3p  |
| miR-192-5p  | miR-523-5p  |
| miR-196a-5p | miR-744-5p  |
| miR-200a-3p | miR-885-5p  |
| miR-203a-3p | miR-92a-3p  |
| miR-205-5p  | miR-93-5p   |

---

**Supplementary Table 2:** List of immunological focused miRNA panel

| <b>Systemic Name</b> | <b>Mirbase Accession No</b> | <b>Regulation</b> | <b>Fold Change</b> | <b>p (corr)</b> |
|----------------------|-----------------------------|-------------------|--------------------|-----------------|
| hsa-miR-221-3p       | MIMAT0000278                | ↑                 | 1.76               | 0.000005        |
| hsa-miR-130a-3p      | MIMAT0000425                | ↑                 | 1.63               | 0.00009         |
| hsa-miR-146a-5p      | MIMAT0000449                | ↑                 | 1.93               | 0.0001          |
| hsa-miR-151a-5p      | MIMAT0004697                | ↑                 | 1.98               | 0.0002          |
| hsa-miR-26a-5p       | MIMAT0000082                | ↑                 | 1.69               | 0.0020          |
| hsa-miR-21-5p        | MIMAT0000076                | ↑                 | 1.55               | 0.0202          |
| hsa-miR-16-5p        | MIMAT0000069                | ↓                 | 0.75               | 0.0225          |
| hsa-miR-744-5p       | MIMAT0004945                | ↑                 | 2.49               | 0.0318          |
| hsa-miR-451a         | MIMAT0001631                | ↓                 | 0.67               | 0.0436          |
| hsa-miR-150-5p       | MIMAT0000451                | ↓                 | 0.66               | 0.0889          |
| hsa-miR-494-3p       | MIMAT0002816                | ↑                 | 3.65               | 0.0925          |
| hsa-miR-30b-5p       | MIMAT0000420                | ↑                 | 1.41               | 0.1185          |
| hsa-miR-431-3p       | MIMAT0001625                | ↑                 | 1.61               | 0.1213          |
| hsa-miR-7d-5p        | MIMAT0000065                | ↑                 | 1.6                | 0.1477          |
| hsa-miR-181b-5p      | MIMAT0000257                | ↑                 | 1.56               | 0.1512          |
| hsa-miR-93-5p        | MIMAT0000093                | ↓                 | 0.85               | 0.2566          |
| hsa-miR-24-3p        | MIMAT0000080                | ↑                 | 1.28               | 0.3666          |
| hsa-miR-20b-5p       | MIMAT0001413                | ↓                 | 0.8                | 0.7087          |
| hsa-miR-205-5p       | MIMAT0000266                | ↓                 | 0.46               | 0.7158          |
| hsa-miR-33a-5p       | MIMAT0000091                | ↑                 | 2.14               | 0.8663          |

P (corr); Bonferroni-corrected one-way ANOVA

**Supplementary Table 3:** Differentially expressed serum miRNA between PsA and healthy controls.

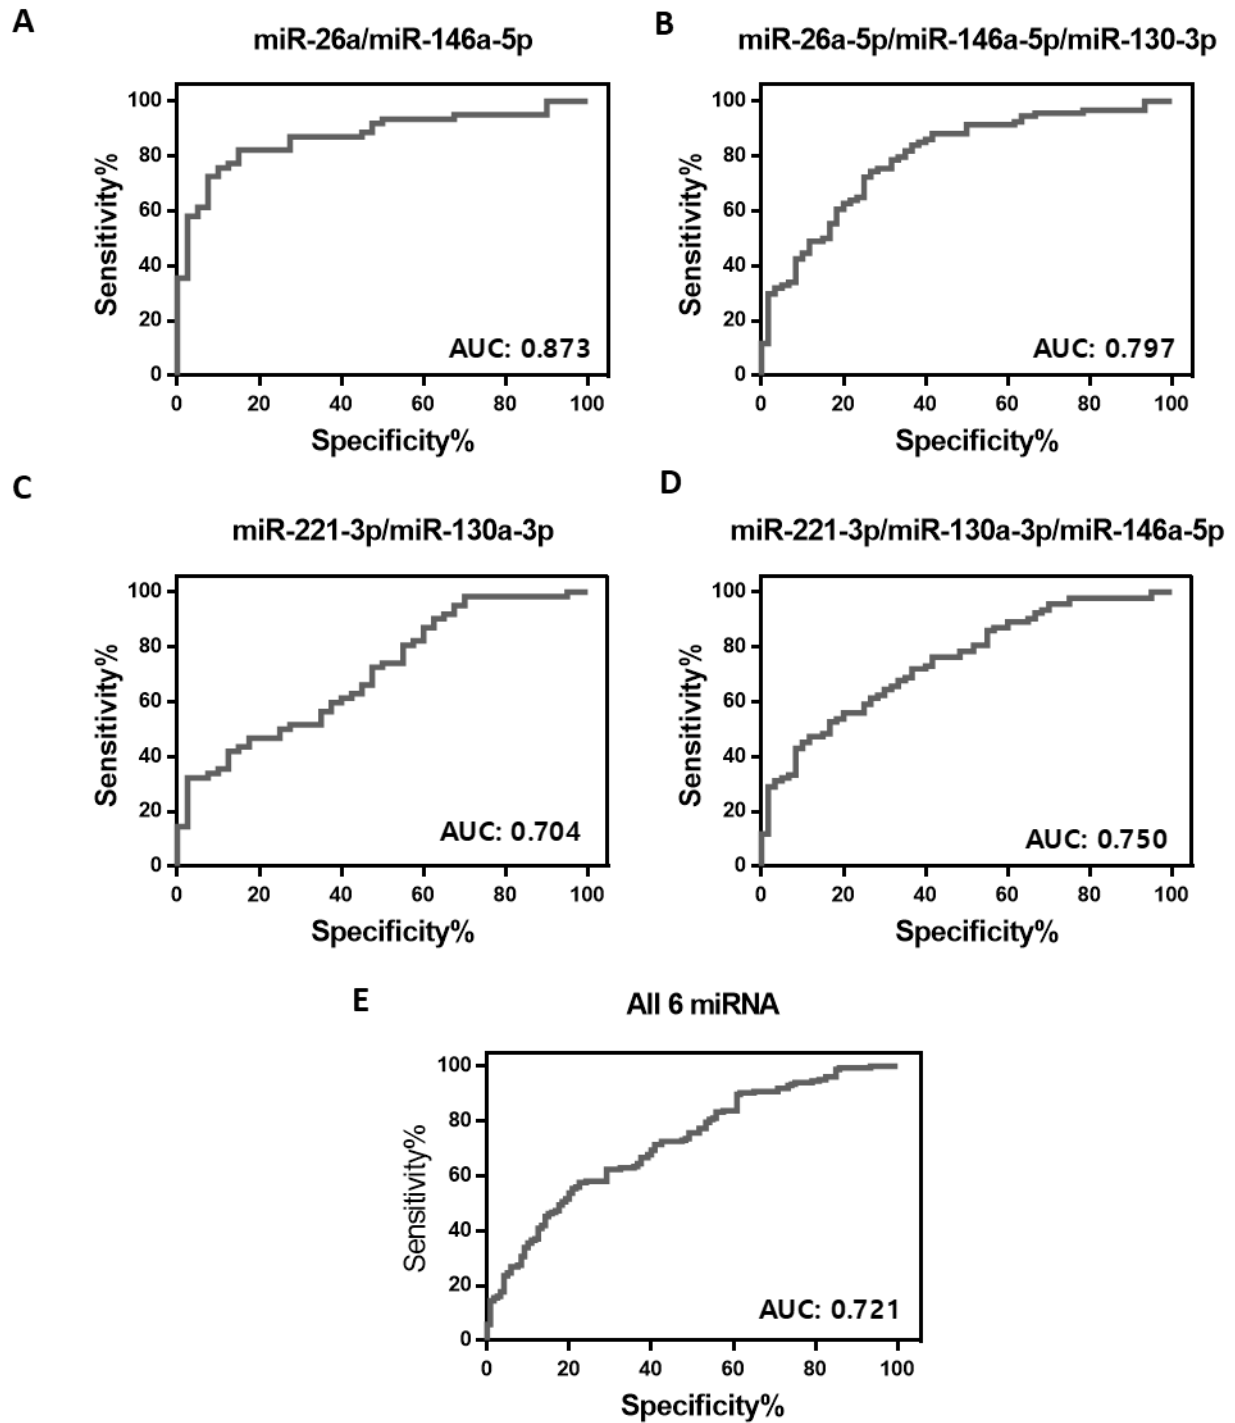

**Supplementary Figure 1:** The diagnostic value of multi-variant serum miRNA for (A) two-miRNA signature, miR-26a-5p and miR-146a-5p, and (B) three-miRNA signature, miR-26a-5p, miR-146a-5p, and miR-130a-3p, with the strongest individual AUC values. The predictive value for the most differently expressed (C) two-miRNA signature, miR-221-3p and miR-130a-3p, and (D) three-miRNA signature, miR-221-3p, miR-130a-3p, and miR-146a-5p, as compared to healthy controls. (E) The predictive value of the six-miRNA signature.

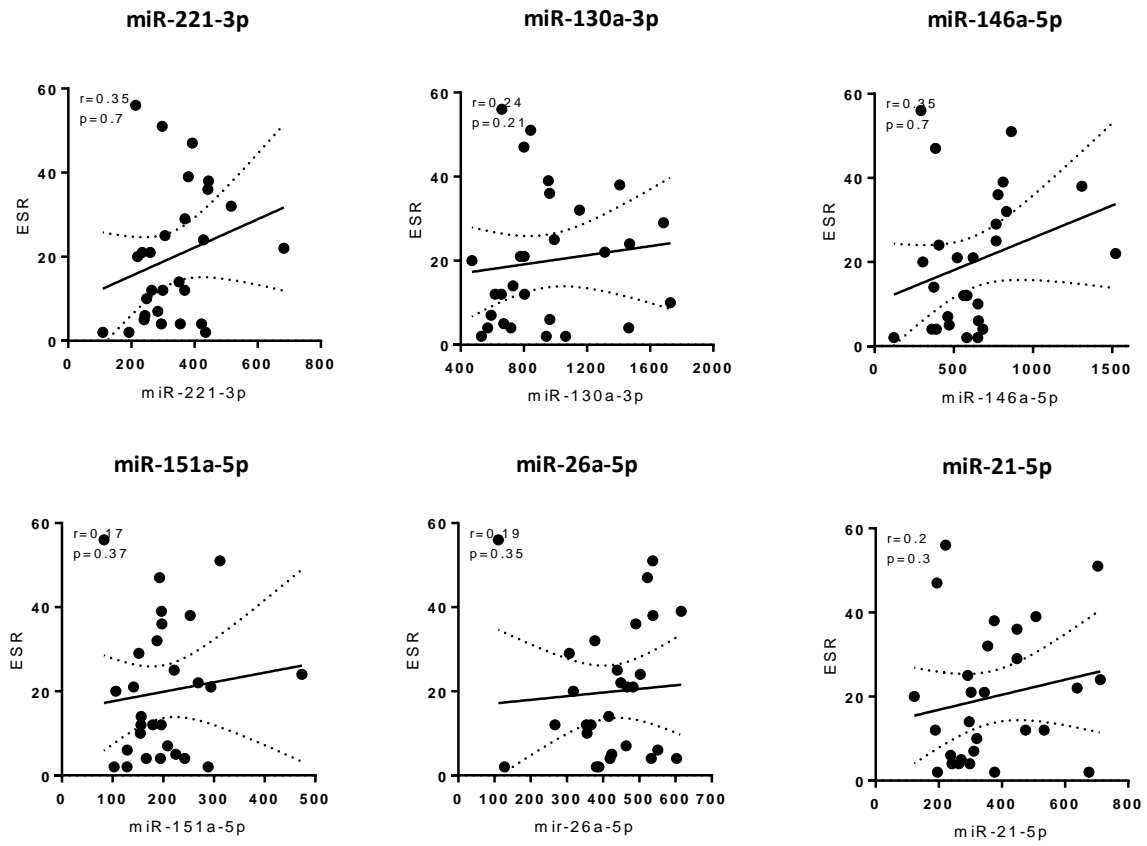

**Supplementary Figure 2:** Spearman pair-wise correlation analysis of miRNA expression and ESR.

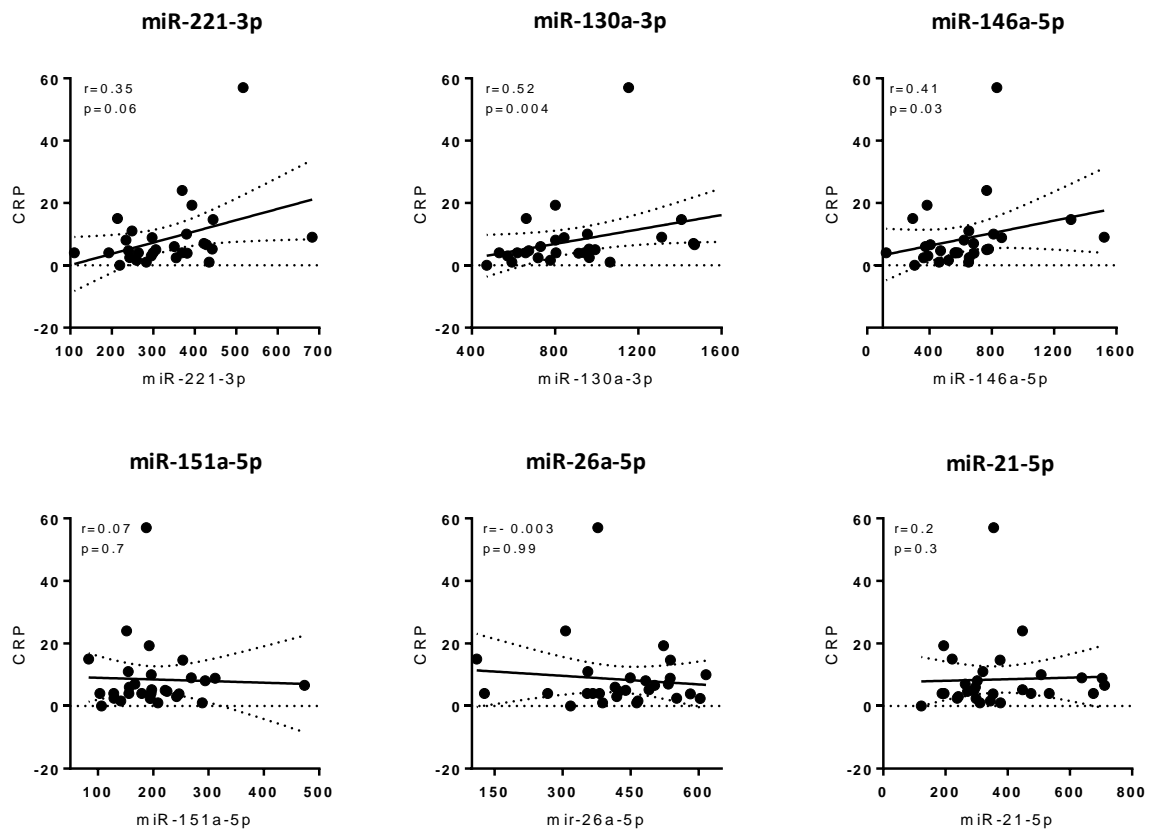

**Supplementary Figure 3:** Spearman pair-wise correlation analysis of miRNA expression and CRP.

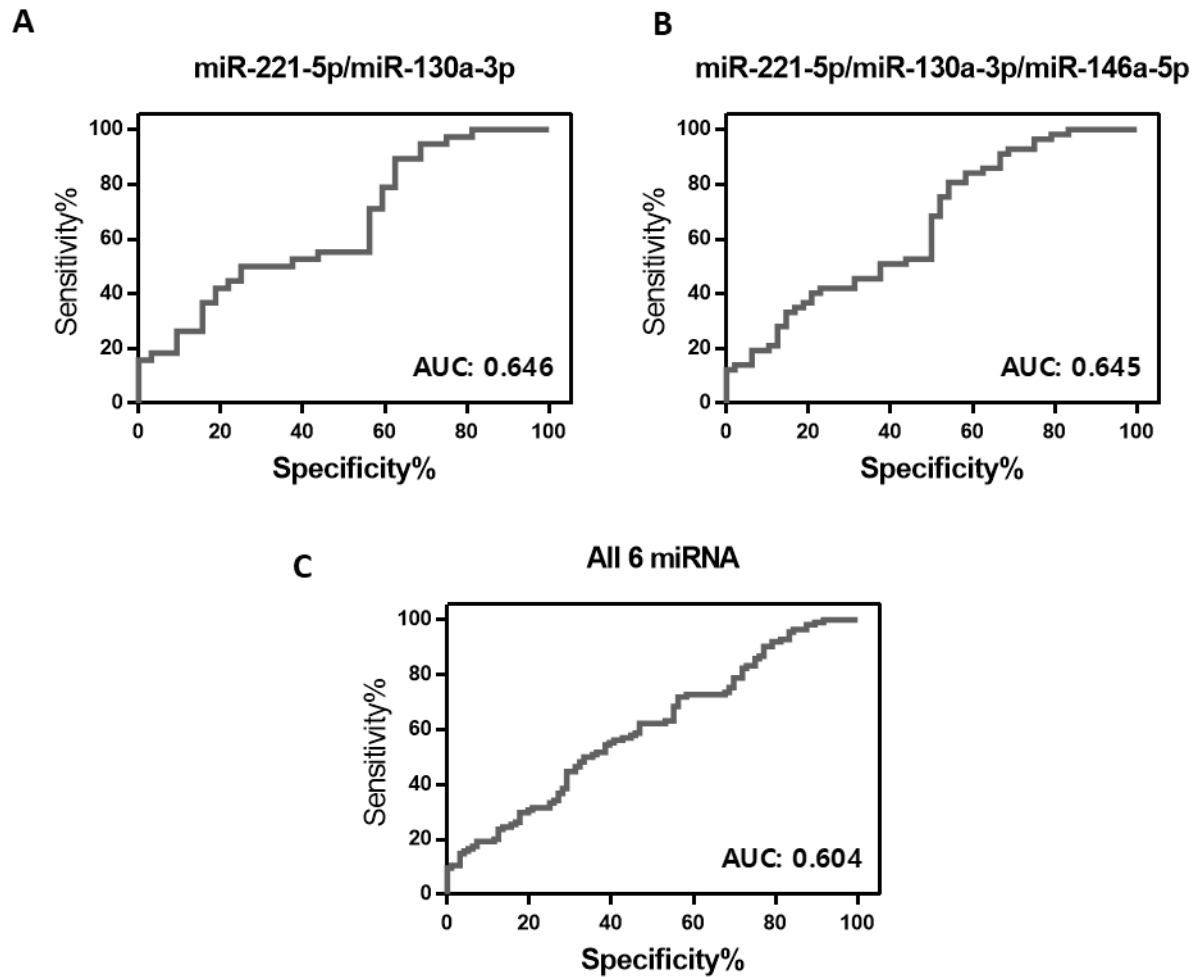

**Supplementary Figure 4:** The prognostic value of multi-variant serum miRNA for (A) two-miRNA signature, miR-26a-5p and miR-146a-5p, and (B) three-miRNA signature, of the strongest individual AUC values, for response to therapy. (C) The prognostic value of the six-miRNA signature.

| <b>Parameter</b>   | <b>Responder</b> | <b>Non-Responder</b> |
|--------------------|------------------|----------------------|
| <b>Number, n</b>   | 14               | 18                   |
| <b>CRP, mg/l</b>   | 13.21 (3.8)      | 3.87 (0.54)          |
| <b>ESR, mm/h</b>   | 19.78 (4.2)      | 14.42 (2.59)         |
| <b>SJC</b>         | 7.32 (2.58)      | 1.42 (0.28)          |
| <b>TJC</b>         | 3 (0.92)         | 2.37 (0.65)          |
| <b>Synovitis</b>   | 54.16 (8.58)     | 70.24 (3.52)         |
| <b>Vascularity</b> | 67.58 (4.55)     | 69.69 (4.24)         |

CRP, C - reactive protein; ESR, erythrocyte sedimentation rate; SJC, swollen joint count; TJC, tender joint count. Mean (Std. Error of Mean)

**Supplementary Table 4:** Responder and non-responder patient demographics
